# Supplementary material for: Supplementation with Red Palm Oil Increases β‐Carotene and Vitamin A Blood Levels in Patients with Cystic Fibrosis
Source: Hindawi journal article supplement (doi:10.1155/2015/817127), 2015-01-01
Supplement: f1 [file 817127.f1.pdf]

**Table E1:**

Carotenoid composition of crude red palm oil (Choo YM et al. J Am Oil Chem Soc 1996).

| <b>Carotenoid</b>       | <b>Red Palm Oil [mg/kg]</b> |
|-------------------------|-----------------------------|
| phytoene                | 1.3                         |
| phytofluene             | 0.1                         |
| cis- $\beta$ -carotene  | 0.7                         |
| $\beta$ -carotene       | 56.0                        |
| $\alpha$ -carotene      | 35.1                        |
| cis- $\alpha$ -carotene | 2.5                         |
| $\nu$ -carotene         | 0.7                         |
| $\xi$ -carotene         | 0.3                         |
| $\delta$ -carotene      | 0.8                         |
| neurosporene            | 0.3                         |
| $\beta$ -zeaxanthin     | 0.7                         |
| $\alpha$ -zeacarotene   | 0.2                         |
| lycopene                | 1.3                         |
